# Supplementary material
Source: PubMed Central journal article supplement (PMC5724014)
Supplement: 10.1074_M117.814491_jbc.M117.814491-1.pdf [file 10.1074_M117.814491_jbc.M117.814491-1.pdf]

**SUPPLEMENTAL DATA for the manuscript:**

**OVEREXPRESSION OF SPHINGOSINE-1 PHOSPHATE LYASE PROTECTS  
INSULIN-SECRETING CELLS AGAINST CYTOKINE TOXICITY**

**Claudine Hahn<sup>1\*</sup>, Karolina Tyka<sup>1\*</sup>, Julie D. Saba<sup>2</sup>, Sigurd Lenzen<sup>1</sup> and Ewa Gurgul-Convey<sup>1</sup>**

From <sup>1</sup>Institute of Clinical Biochemistry, Hannover Medical School, 30625 Hannover, Germany, <sup>2</sup> Children's Hospital Oakland Research Institute, University of California, San Francisco, CA, USA

\*equally contributed to this work

**This file contains the following supplementary data:**

**Table S1, Table S2, Table S3 and Table S4**

**Table S1. Effects of cytokines on the mRNA level of the most abundant S1P receptor and transporter types in insulin-secreting INS1E cells.**

| Gene         |      | untreated        | IL-1 $\beta$       | Cytokine mixture    |
|--------------|------|------------------|--------------------|---------------------|
| <i>S1Pr2</i> | 6 h  | 100 $\pm$ 20 (4) | 157 $\pm$ 33 (4)   | 268 $\pm$ 62 (4)    |
|              | 24 h | 100 $\pm$ 22 (3) | 463 $\pm$ 127 (3)* | 375 $\pm$ 107 (3)*  |
| <i>S1Pr3</i> | 6 h  | 100 $\pm$ 22 (4) | 33 $\pm$ 12 (4)**  | 33 $\pm$ 15 (4)**   |
|              | 24 h | 100 $\pm$ 20 (6) | 204 $\pm$ 71 (6)*  | 190 $\pm$ 51 (6)**  |
| <i>S1Pr5</i> | 6 h  | 100 $\pm$ 10 (4) | 95 $\pm$ 24 (4)    | 116 $\pm$ 12 (4)    |
|              | 24 h | 99 $\pm$ 10 (6)  | 175 $\pm$ 24 (6)** | 194 $\pm$ 45 (6)*   |
| <i>abca1</i> | 6 h  | 100 $\pm$ 7 (4)  | 71 $\pm$ 7 (4)*    | 53 $\pm$ 5 (4)**    |
|              | 24 h | 100 $\pm$ 10 (6) | 236 $\pm$ 28 (6)** | 289 $\pm$ 27 (6)*** |

Total RNA was isolated and after reverse transcription real-time RT-PCR was performed. Expression was normalized to the house-keeping gene  $\beta$ -actin. Shown are values as % of untreated. Data are means  $\pm$  SEM, with the number of experiments indicated in parentheses. \*p<0.05, \*\*p<0.01, \*\*\*p<0.001 vs. untreated, ANOVA followed by Bonferroni.

**Table S2. Concentration-dependent effects of S1P on cell viability in insulin-secreting INS1E cells**

| S1P [ $\mu$ M] | Cell viability  |
|----------------|-----------------|
|                | 24 h            |
| 0              | 100 $\pm$ 2 (5) |
| 0.5            | 94 $\pm$ 3 (4)  |
| 5              | 92 $\pm$ 3 (4)  |
| 10             | 72 $\pm$ 8 (4)  |
| 25             | 47 $\pm$ 13 (4) |

Cell viability was measured after a 24 h incubation with various concentrations of S1P by means of the MTT assay. Shown are values as % of untreated. Data are means  $\pm$  SEM, with the number of experiments indicated in parentheses. \* $p$ <0.05 vs. untreated, ANOVA followed by Bonferroni.

**Table S3. Gene expression of enzymes of the sphingolipid pathway in insulin-secreting INS1E cells.**

| Gene                 | relative gene expression |   |         |      |
|----------------------|--------------------------|---|---------|------|
| <i>CerS1</i>         | 1.6E-04                  | ± | 4.2E-05 | (7)  |
| <i>CerS2</i>         | 1.9E-02                  | ± | 2.6E-03 | (8)  |
| <i>CerS3</i>         | 5.4E-06                  | ± | 2.2E-06 | (8)  |
| <i>CerS4</i>         | 9.3E-08                  | ± | 4.2E-08 | (7)  |
| <i>CerS5</i>         | 3.4E-02                  | ± | 3.8E-03 | (8)  |
| <i>spp1</i>          | 2.0E-04                  | ± | 3.6E-05 | (8)  |
| <i>spp2</i>          | 1.2E-03                  | ± | 2.6E-04 | (8)  |
| <i>sk1</i>           | 1.0E-04                  | ± | 1.5E-05 | (11) |
| <i>sk2</i>           | 6.3E-03                  | ± | 1.5E-03 | (8)  |
| <i>CDase acid</i>    | 1.4E-02                  | ± | 2.9E-03 | (12) |
| <i>CDase neutral</i> | 5.5E-03                  | ± | 1.2E-03 | (9)  |
| <i>spl</i>           | 6.9E-03                  | ± | 6.5E-04 | (10) |
| <i>SPT lc1</i>       | 2.2E-02                  | ± | 3.1E-03 | (3)  |
| <i>SPT lc2</i>       | 8.0E-03                  | ± | 2.1E-03 | (4)  |
| <i>SPT sc</i>        | 2.8E-05                  | ± | 1.0E-05 | (4)  |
| <i>SMS acid</i>      | 1.5E-02                  | ± | 2.8E-03 | (4)  |
| <i>SMS alkaline</i>  | 1.7E-05                  | ± | 1.3E-06 | (3)  |
| <i>SMase</i>         | 1.2E-03                  | ± | 3.0E-04 | (7)  |
| <i>Aldh3a2</i>       | 2.6E-03                  | ± | 2.2E-04 | (15) |

Gene expression was measured in untreated insulin-secreting INS1E cells by means of real-time RT-PCR and normalized to the house-keeping gene  $\beta$ -actin, using the QuantiTect SYBR Green<sup>TM</sup> technology (QIAGEN, Hilden, Germany) based on a fluorescent dye that binds only double-stranded DNA. The reactions were performed using the DNA Engine Opticon<sup>TM</sup> Sequence Detection System (Biozym Diagnostik, Hess. Oldendorf, Germany). Data are means  $\pm$  SEM, with the number of experiments indicated in parentheses.

**Table S4 Primers used in real-time RT-PCR analysis (all from Invitrogen)**

| <b>Gene</b>           | <b>FW</b>              | <b>REV</b>             |
|-----------------------|------------------------|------------------------|
| <i>S1Pr1</i>          | CATCTGCTGCTTGATCATCC   | AGCCTCCTGCTAACAGGT     |
| <i>S1Pr2</i>          | CCTTCGTGGCCAACACCTT    | ATGGCCAGGAGGCTGAA      |
| <i>S1Pr3</i>          | ATCTTGCCCCTCTACTCCAA   | GGATCTCTCGGAGTTGTGGT   |
| <i>S1Pr4</i>          | TATGGCTGCATCGGTCTGT    | AGAGCACATAGCCCTTGGAG   |
| <i>S1Pr5</i>          | TGTGCGCTTTCATCGTGC     | AGGATGTTGGTGGCGTAGG    |
| <i>Abca1</i>          | CCCTCCTGGAGAGTGCTTTG   | CTGGTCACAGCGGTATCTCC   |
| <i>Abcc1</i>          | GATGGGGCCTTTGCTGAGTT   | CCCTAAACCACTGACACCATTC |
| <i>Abcg2</i>          | ATGTTAGGACTGAAGAGGACGG | AGACACTACGCTTTGGCCTG   |
| <i>Aldh3a2</i>        | CTCCCAACAGCGAGTCCAAG   | ATCACAGCTGATCCTTGACGA  |
| <i>Spns2</i>          | CCTCATGCTGTGCCCTTTTG   | CTCGTCAGCCTGCTGCTC     |
| <i>Cer Synthase1</i>  | TACCCTTTCTTCCATGACCC   | CGGTGGCATAGACGGAAT     |
| <i>Cer Synthase2</i>  | GCTTGCTTTCTACTGGTCCC   | CTGCTCGGACATAAATTGGCA  |
| <i>Cer Synthase3</i>  | TACGGACTGGCAAAGAAGTG   | CAGCCACCGTCATCATGAAA   |
| <i>Cer Synthase4</i>  | TGCTGCCTTGCCAATTG      | GCACTGGGTTGGGCTTTATC   |
| <i>Cer Synthase5</i>  | GCTGGCAGCAGGTCTCTTCT   | CCCTTCAGCCTTTTCTCATC   |
| <i>Alkaline CDase</i> | ACAACAACACTTGGGTGGTG   | ATCCTGTCAACATGCCAC     |
| <i>Neutral CDase</i>  | ACTCTGGCCCAGCAGGATT    | GGACTTTGCCCGGTTTAAGA   |
| <i>Alkaline SMS</i>   | TGACTGGGGGTCTGTCCAA    | GCAGGAGTCATGTAGCGAGC   |
| <i>Acid SMS</i>       | TCTTTGAGGACGATGTGGTG   | GCACTGATGGCAAAGAGATG   |
| <i>sk1</i>            | CTTCTGGAGGAGGCTGAGGT   | TCAGACCGTCACCGGACAT    |
| <i>sk2</i>            | CAAGCCCTACACATACAGCG   | GCCACGTGGGTAGGTGTAGA   |
| <i>spp1</i>           | CGAGCTGGCCAAAGTGAGCA   | AGATGATCACCAGCCTCCGG   |
| <i>spp2</i>           | TTCTCCCATTCACCCACTG    | TCACAACGGGAGGAGAGGAG   |
| <i>spl</i>            | GCCATTCCTGAAGTTGGACA   | CCTGAGGCTTTCCCTTCTTG   |
| <i>huSPL</i>          | ACGGCCTGGTGGCATT       | CTGACAATTGGGGATTCCC    |

|                                 |                          |                       |
|---------------------------------|--------------------------|-----------------------|
| <i>SpMn</i>                     | GGCTGCTGGTGGCTCCATCTA    | TGGATGAACTGGGCCAGTT   |
| <i>SPTlc1</i>                   | TTGAAGAATGGCAGCCAGAG     | CCGAGGAAATTAAGGAGGC   |
| <i>SPTlc2</i>                   | GAAAAGTGCCACCATGCAAC     | ACAGATGGGTCGATTCCAGT  |
| <i>SPTsc</i>                    | GAAGGAGTATTTTGCCTGGC     | GGGGATGAAGACATAGGCAG  |
| <i>bip</i>                      | CCACCAGGATGCAGACATTG     | AGGGCCTCCACTTCCATAGA  |
| <i>chop</i>                     | CCAGCAGAGGTCACAAGCAC     | CGCACTGACCACTCTGTTC   |
| <i><math>\beta</math>-actin</i> | GAACACGGCATTGTAACCAACTGG | GGCCACACGCAGCTCATTGTA |
